# Supplementary material for: Does Drosophila sechellia escape parasitoid attack by feeding on a toxic resource?
Source: PeerJ. 2021 Jan 6;9:e10528. doi: 10.7717/peerj.10528 (PMC7796662; doi:10.7717/peerj.10528)
Supplement: Supplemental Information 1 [file peerj-09-10528-s001.xlsx]

## Sheet: LabData
# RAW DATA OF THE LAB EXPERIMENT
# sample: petri dish containing set of larvae
# species: Drosophila host species
# medium: feeding substrate for host larvae
# start: number of initial larvae
# not_parasitized: number of unparasitized adult flies
# capsule: number of flies with capsule
# wasps: number of wasps that emerged
# survival: number of emerged adult insects (not_parasitized+capsule+wasp)
#mortality: 25-survival (number of initial larvae - emerged adult insects)
	sample	species	medium	treatment	start	not_parasitized	capsule	wasps	survival	mortality
	mel6	melanogaster	noni	wasp	25	1	0	0	1	24
	mel7	melanogaster	noni	wasp	25	3	2	0	5	20
	mel8	melanogaster	noni	wasp	25	6	0	0	6	19
	mel9	melanogaster	noni	wasp	25	8	4	0	12	13
	sim6	simulans	noni	wasp	25	28	0	2	30	0
	sim8	simulans	noni	wasp	25	18	7	0	25	0
	sim9	simulans	noni	wasp	25	7	1	0	8	17
	sim10	simulans	noni	wasp	25	25	0	0	25	0
	mel10	melanogaster	noni	control	25	14	0	0	14	11
	mel20	melanogaster	noni	control	25	17	0	0	17	8
	sim15	simulans	noni	control	25	23	0	0	23	2
	sim17	simulans	noni	control	25	20	0	0	20	5
	sim19	simulans	noni	control	25	26	0	0	26	0
	sim20	simulans	noni	control	25	23	0	0	23	2
	mel1	melanogaster	yeast	wasp	25	1	1	15	17	8
	mel2	melanogaster	yeast	wasp	25	8	2	1	11	14
	mel3	melanogaster	yeast	wasp	25	0	0	12	12	13
	mel4	melanogaster	yeast	wasp	25	0	0	4	4	21
	sim1	simulans	yeast	wasp	25	15	11	0	26	0
	sim2	simulans	yeast	wasp	25	3	2	7	12	13
	sim3	simulans	yeast	wasp	25	9	1	4	14	11
	sim4	simulans	yeast	wasp	25	1	1	10	12	13
	mel5	melanogaster	yeast	control	25	16	0	0	16	9
	mel16	melanogaster	yeast	control	25	6	0	0	6	19
	mel17	melanogaster	yeast	control	25	16	0	0	16	9
	mel19	melanogaster	yeast	control	25	17	0	0	17	8
	sim5	simulans	yeast	control	25	26	0	0	26	0
	sim16	simulans	yeast	control	25	17	0	0	17	8
	sim18	simulans	yeast	control	25	24	0	0	24	1
	sim21	simulans	yeast	control	25	22	0	0	22	3
