# Supplementary material for: Does Drosophila sechellia escape parasitoid attack by feeding on a toxic resource?
Source: PeerJ. 2021 Jan 6;9:e10528. doi: 10.7717/peerj.10528 (PMC7796662; doi:10.7717/peerj.10528)
Supplement: Supplemental Information 2 [file peerj-09-10528-s002.xlsx]

## Sheet: FieldData
# RAW DATA OF THE FIELD EXPERIMENT
# sample: noni fruit collected in the field
# date_collection: date in which the sample was collected in bucket
# date_closure: date in which bucket with noni sample was closed
# days_open: number of days in which field observations were made with open bucket
# dsechellia: number of flies identified as D. sechellia
# dmalerkotliana: number of flies identified as D. malerkotliana
#wasps: number of wasps that emerged from each bucket with noni
	sample	date_collection	date_closure	days_open	dsechellia	dmalerkotliana	wasps
	1	2014-03-18	2014-03-19	1	14	29	0
	2	2014-03-18	2014-03-19	1	10	8	0
	3	2014-03-18	2014-03-19	1	3	36	0
	4	2014-03-20	2014-03-22	2	15	0	0
	5	2014-03-20	2014-03-22	2	13	0	0
	6	2014-03-21	2014-03-23	2	18	0	0
	7	2014-03-21	2014-03-23	2	2	0	0
	8	2014-03-21	2014-03-23	2	9	0	0
	9	2014-03-21	2014-03-23	2	4	0	0
	10	2014-03-22	2014-03-24	2	46	0	0
	11	2014-03-22	2014-03-24	2	11	0	0
	12	2014-03-31	2014-04-04	4	0	8	3
	13	2014-03-01	2014-04-04	3	0	4	0
	14	2014-03-01	2014-04-04	3	0	10	0
	15	2014-03-01	2014-04-04	3	3	7	6
	16	2014-03-01	2014-04-04	3	0	1	0
	17	2014-03-01	2014-04-04	3	0	1	0
	18	2014-03-01	2014-04-04	3	0	4	0
	19	2014-03-01	2014-04-04	3	0	1	0
